# Supplementary material for: Potential Associations of Mutations within the HIV-1 Env and Gag Genes Conferring Protease Inhibitor (PI) Drug Resistance
Source: MDPI journal article supplement (doi:10.3390/microbiolres12040071), 2021-12-15
Supplement: s1 [file s1]

**Supplementary Materials:**

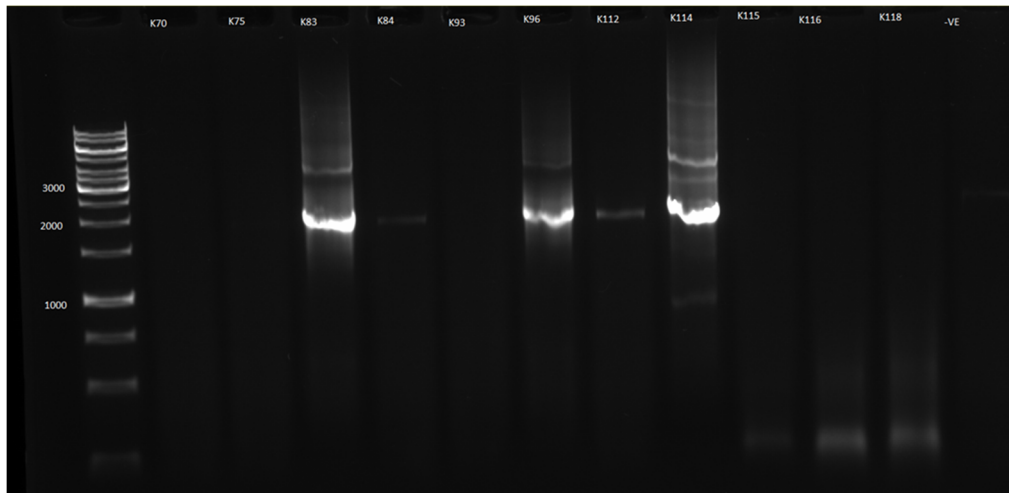

**Supplementary Figure S1.** Gel picture, showing the amplification of Gag-PR. Gag-PR size 1.7 kb.

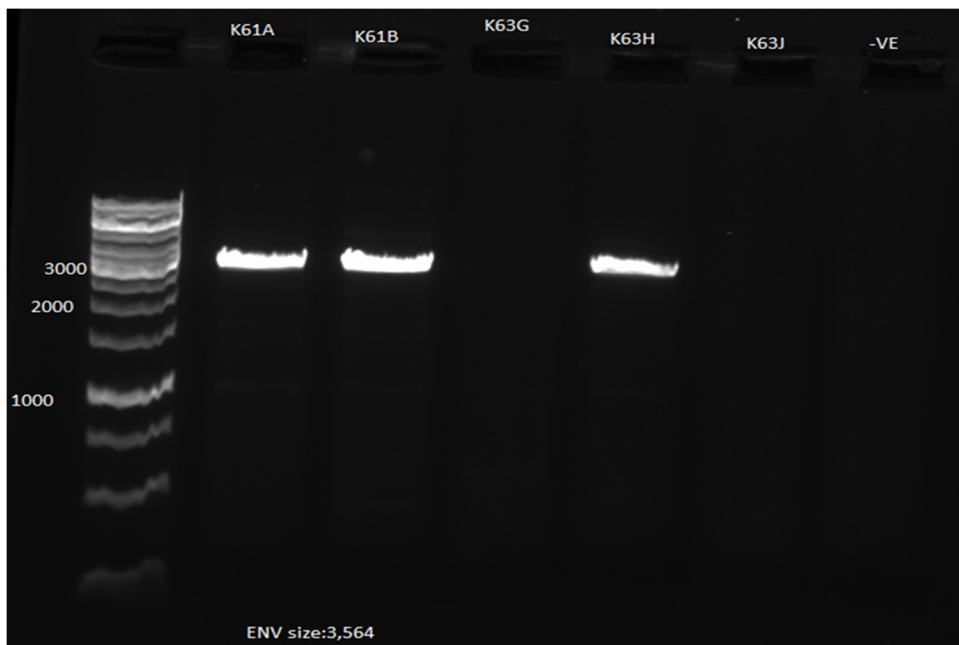

**Supplementary Figure S2.** Gel picture showing the amplification of envelope. Envelope size 3.5 kb.

**Supplementary Table S1.** Sequencing Primers.

| Forward Primers |             |                                             |
|-----------------|-------------|---------------------------------------------|
| REC1F           | 5581 → 5602 | 5'- AGG GGC CGC AGA GGG AAC CAT A -3'       |
| ENV-Z1F         | 6327 → 6353 | 5'- TGG GTC ACA GTC TAT TAT GGG GTA CCT- 3' |
| ENV-DF          | 7208 → 7226 | 5'- AGC ACA TTG TAA CAT TAG T- 3'           |
| ENV-TUG         | 7859 → 7879 | 5'- GTC TGG TAT AGT GCA ACA GCA- 3'         |
| Reverse Primers |             |                                             |
| E270R           | 8566 ← 8585 | 5'- GCG TCC CAG AAG TTC CAC TG- 3'          |
| ENV-ZAR         | 7629 ← 7652 | 5'- GTC CCT CAT ATC TCC TCC TCC TCT- 3'     |
